# Supplementary material for: Differences in XPS and solid state NMR spectral data and thermo-chemical properties of iso-structural compounds in the series KTaF6, K2TaF7 and K3TaF8 and KNbF6, K2NbF7 and K3NbF8
Source: Royal Society of Chemistry journal article supplement (doi:10.1039/c5dt02560e), 2015-01-01

## Electronic Supplementary Information

# Differences in XPS and solid state NMR spectral data and thermo-chemical properties of iso-structural compounds in the series $\text{KTaF}_6$ , $\text{K}_2\text{TaF}_7$ and $\text{K}_3\text{TaF}_8$ and $\text{KNbF}_6$ , $\text{K}_2\text{NbF}_7$ and $\text{K}_3\text{NbF}_8$

*Miroslav Boča<sup>\*†</sup>, Aydar Rakhmatullin<sup>‡</sup>, Jarmila Mlynáriková<sup>†</sup>, Eva Hadzimová<sup>†</sup>, Zuzana  
Vasková<sup>†</sup>, Matej Mičušík<sup>§</sup>.*

<sup>†</sup>Department of Molten Systems, Institute of Inorganic Chemistry, Slovak Academy of Sciences,  
Dúbravská cesta 9, SK-845 36 Bratislava, Slovakia.

<sup>‡</sup>Conditions Extrêmes et Matériaux: Haute Température et Irradiation, CEMHTI, UPR 3079 -  
CNRS Univ Orleans 450 71 Orléans, France.

<sup>§</sup>Polymer Institute, Slovak Academy of Sciences, Dúbravská cesta 9, SK-84541 Bratislava,  
Slovakia.

KEYWORDS: ternary fluorides, XPS, solid state NMR, structure, DSC, molten salts

Fig. S1 Experimental (blue) and simulated (red)  $^{93}\text{Nb}$  MAS NMR spectrum of  $\text{KNbF}_6$  recorded at 9.4T and  $\nu_{\text{rot}} = 31$  kHz.

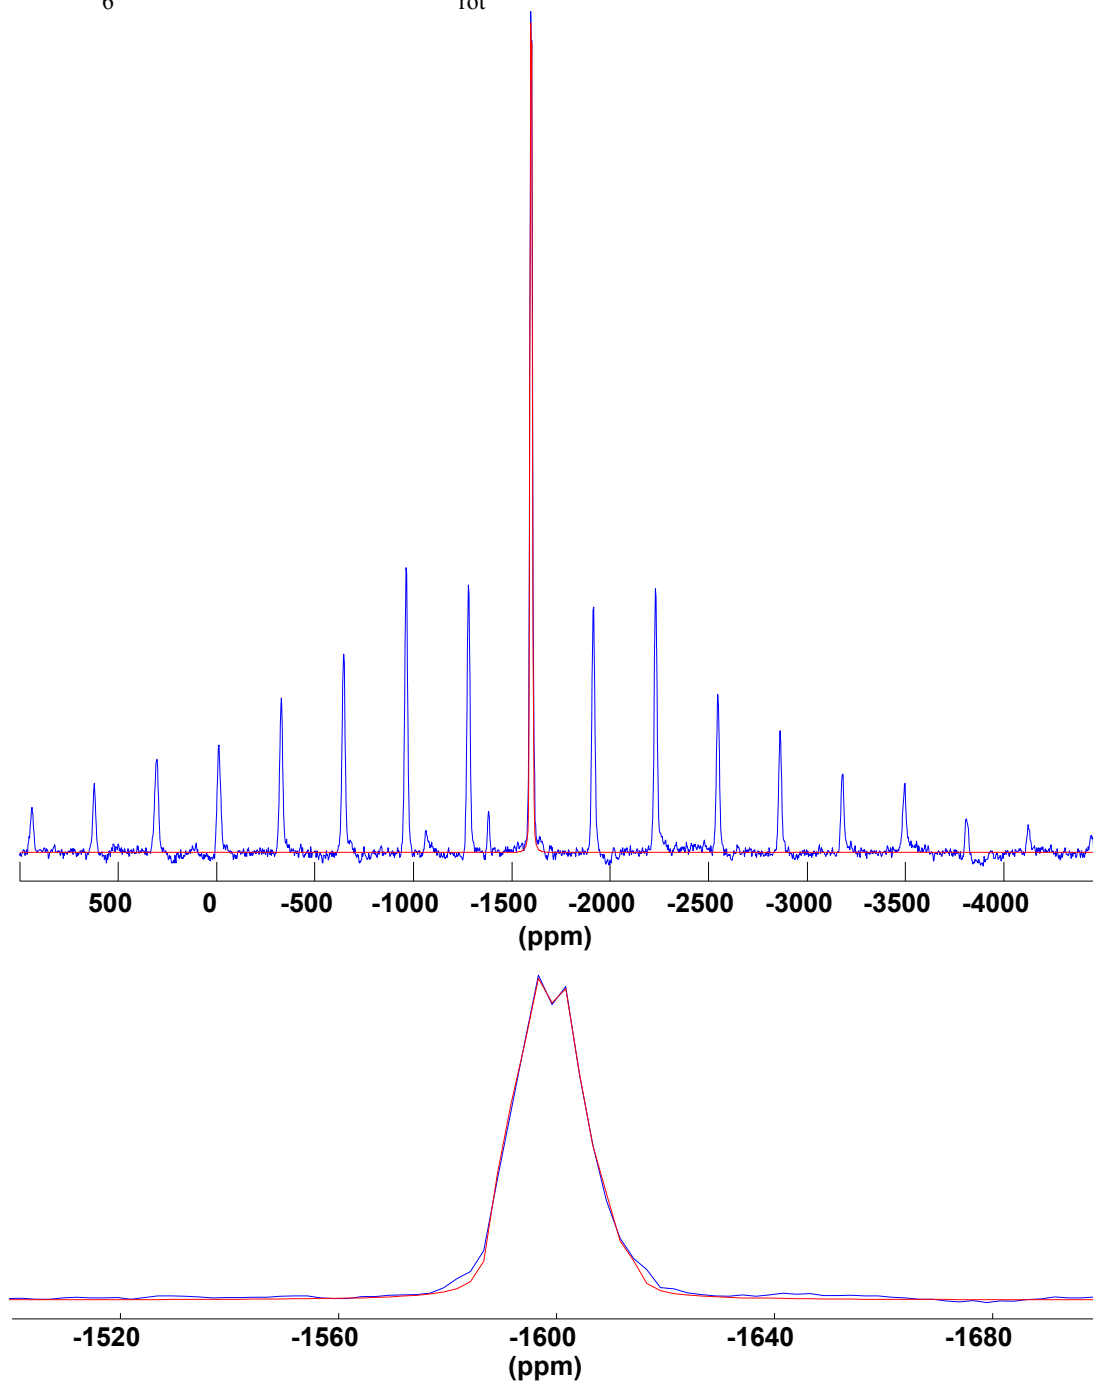

Supplement: c5dt02560e1.pdf [file c5dt02560e1.pdf]
